# Supplementary material for: Rare-earth metal bis(alkyl)s that bear a 2-pyridinemethanamine ligand: Dual catalysis of the polymerizations of both isoprene and ethylene
Source: Royal Society of Chemistry journal article supplement (doi:10.1039/c1dt11890k), 2012-01-01
Supplement: c1dt11890k.pdf [file c1dt11890k.pdf]

## *Supporting information*

**Rare-earth metal bis(alkyl)s that bear a 2-pyridinemethanamine  
ligand: Dual catalysis on the polymerizations of both isoprene  
and ethylene**

Zhongbao Jian<sup>a,b</sup> and Dongmei Cui<sup>\*a</sup>

Email: [dmcui@ciac.jl.cn](mailto:dmcui@ciac.jl.cn)

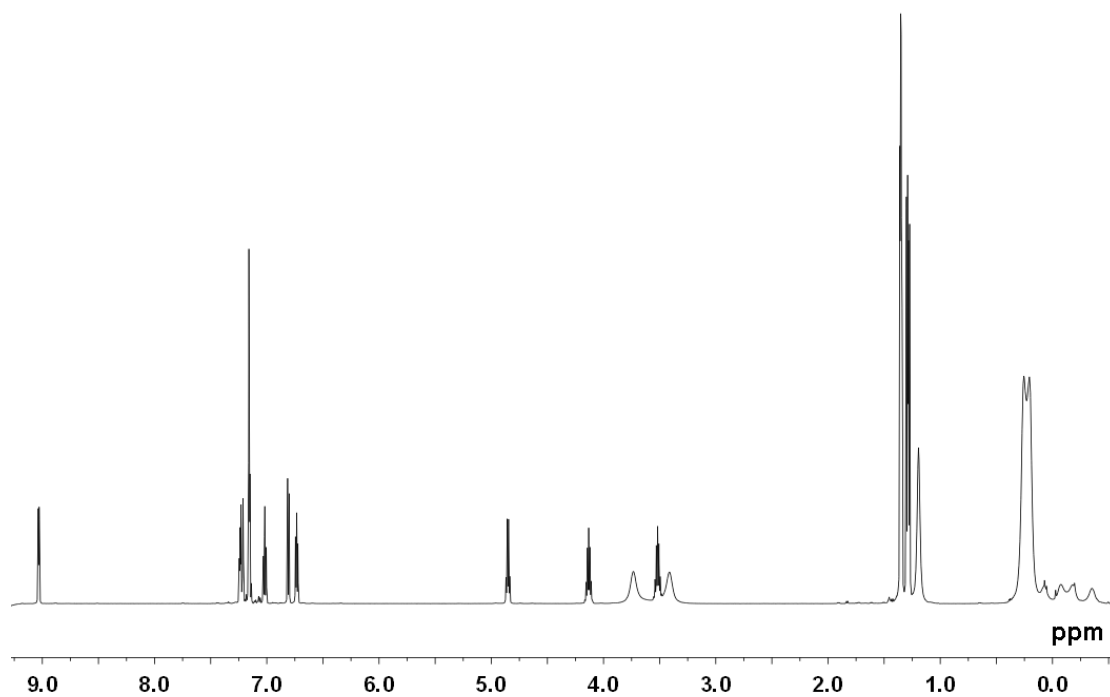

**Figure S1.**  $^1\text{H}$  NMR spectrum ( $[\text{D}_6]$ benzene, 25 °C) of complex **1**.

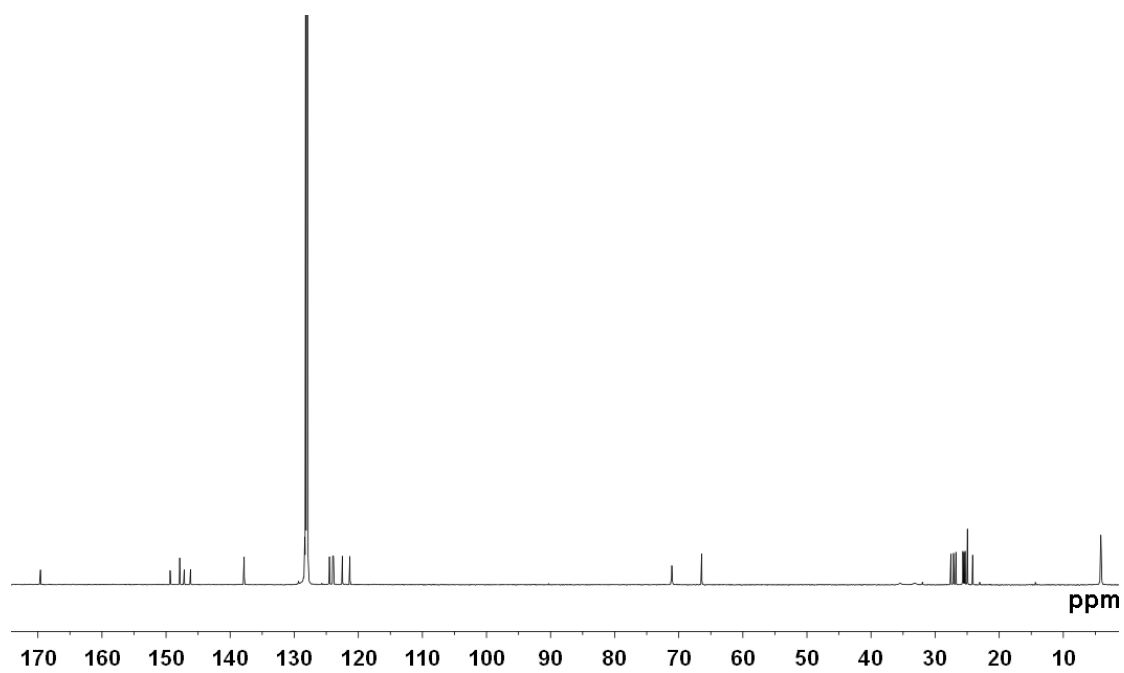

**Figure S2.**  $^{13}\text{C}$  NMR spectrum ( $[\text{D}_6]$ benzene, 25 °C) of complex **1**.

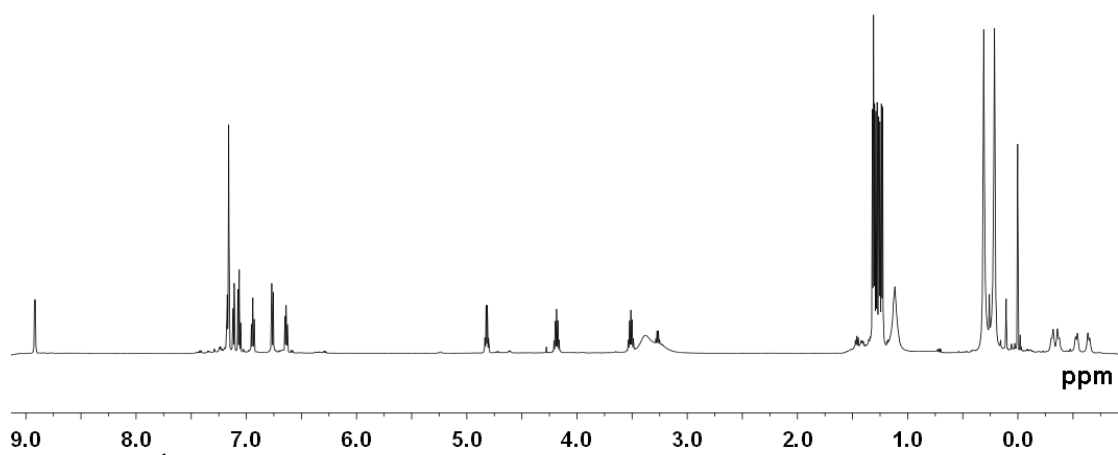

**Figure S3.**  $^1\text{H}$  NMR spectrum ( $[\text{D}_6]$ benzene, 25 °C) of complex **2**.

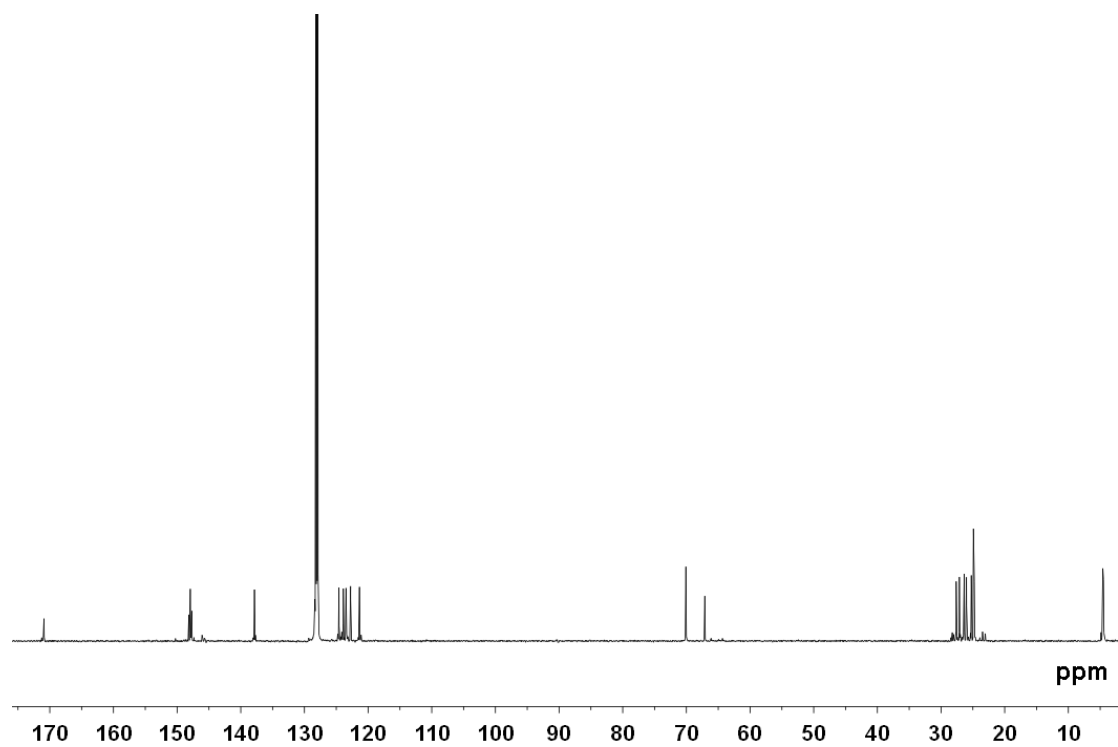

**Figure S4.**  $^{13}\text{C}$  NMR spectrum ( $[\text{D}_6]$ benzene, 25 °C) of complex **2**.

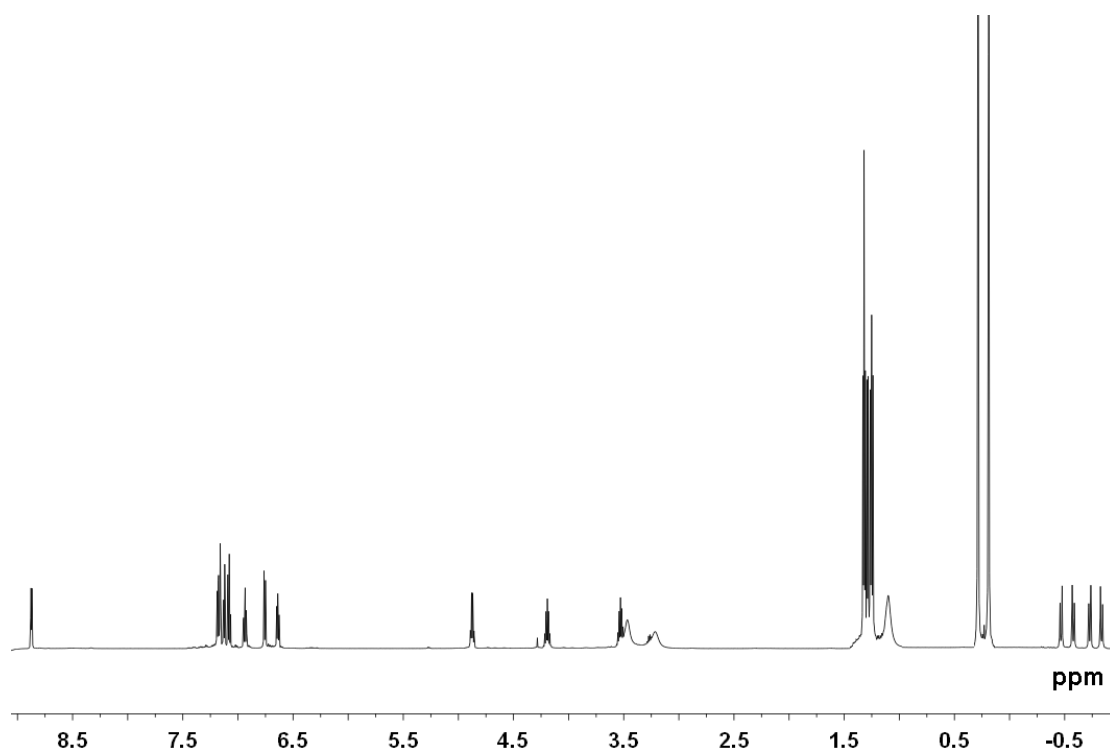

**Figure S5.**  $^1\text{H}$  NMR spectrum ( $[\text{D}_6]$ benzene, 25 °C) of complex 3.

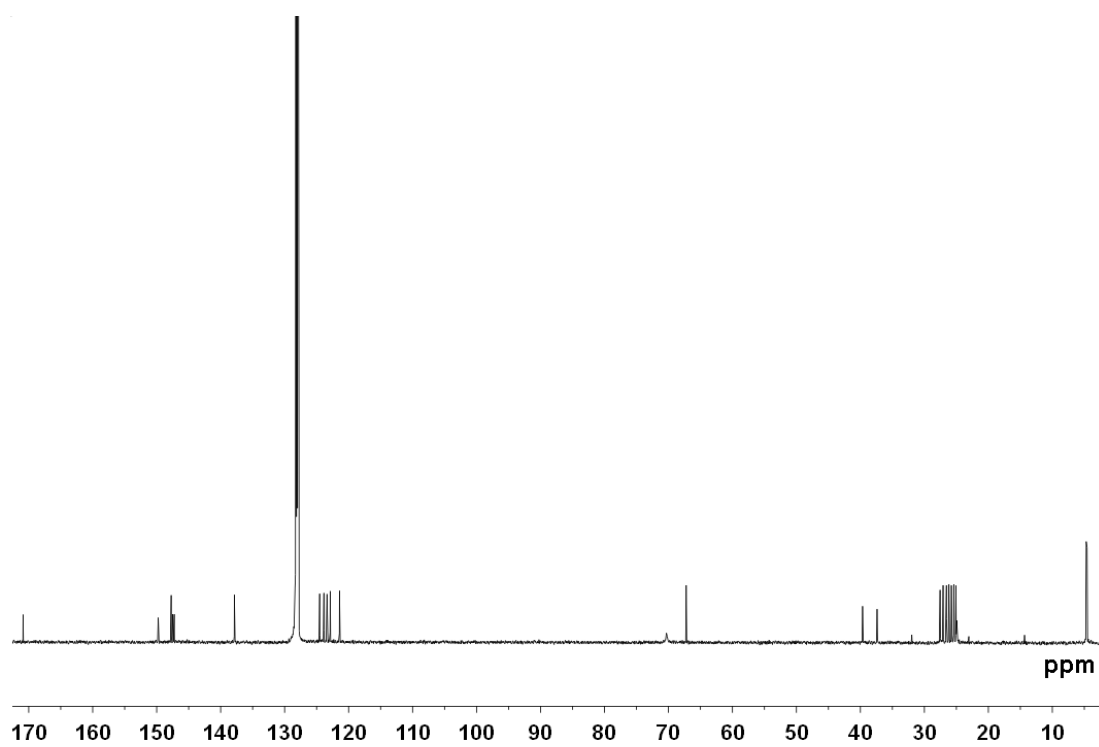

**Figure S6.**  $^{13}\text{C}$  NMR spectrum ( $[\text{D}_6]$ benzene, 25 °C) of complex 3.
